# Supplementary material
Source: MDPI journal article supplement (https://www.mdpi.com/2311-5637/8/11/585)
Supplement: s1 [file s1 › fermentation-1986571-supplementary.pdf]

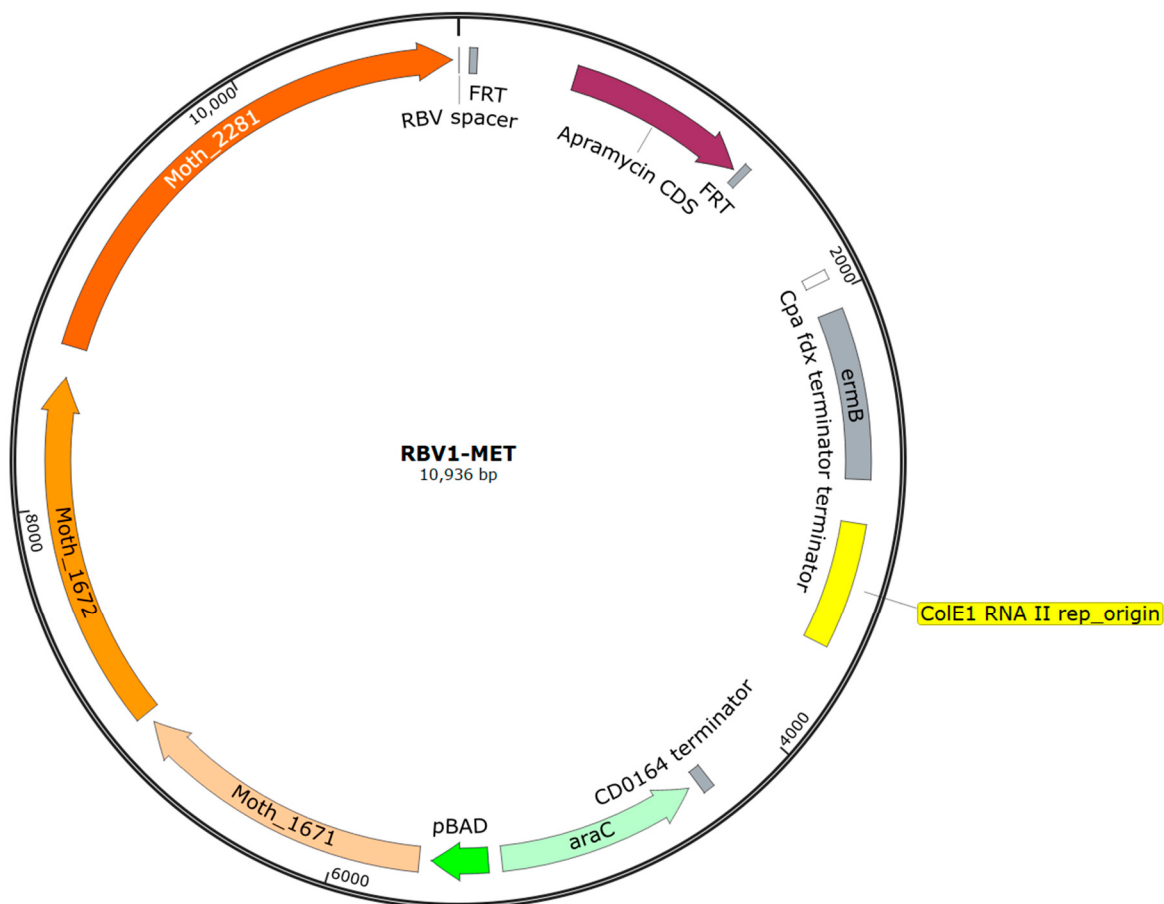

**Figure S1.** Plasmid map of RBV1-MET used in the methylation strain. This plasmid carries the three *M. thermoacetica* methyltransferase genes required to protect foreign DNA from cleavage when inserted in this host.

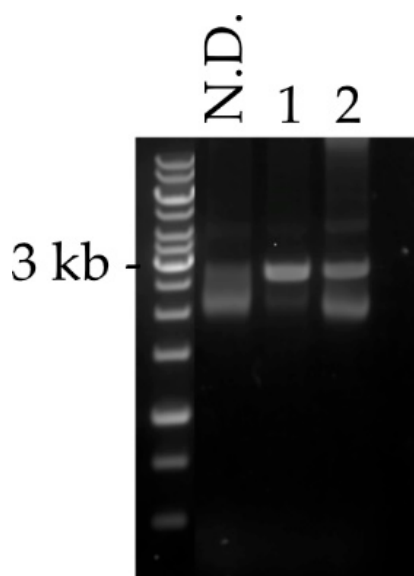

**Figure S2.** The pre-methylated engineered vector was digested with ApaI, an isoschizomer of Moth\_2281, to test for successful methylation. 1, 2: different pre-methylated plasmid extraction; N.D.: non-digested control. Only partial methylation could be achieved for some plasmids (1).
